# Supplementary material for: Ag co-catalyst prepared by ultrasonic reduction method for efficient photocatalytic conversion of CO2 with H2O using ZnTa2O6 photocatalyst
Source: Royal Society of Chemistry journal article supplement (doi:10.1039/d4cy00564c), 2024-01-01
Supplement: d4cy00564c1.pdf [file d4cy00564c1.pdf]

# **Ag co-catalyst prepared by ultrasonic reduction method for efficient photocatalytic conversion of CO<sub>2</sub> with H<sub>2</sub>O using ZnTa<sub>2</sub>O<sub>6</sub> photocatalyst**

Kio KAWATA<sup>a,b</sup>, Shoji IGUCHI<sup>a,\*</sup>, Shimpei NANIWA<sup>a</sup>, Tsunehiro TANAKA<sup>a,c</sup>,

Masamu NISHIMOTO<sup>b</sup>, Kentaro TERAMURA<sup>a,c,\*</sup>

<sup>a</sup> Department of Molecular Engineering, Graduate School of Engineering, Kyoto University, Kyoto-daigaku Katsura, Nishikyo-ku, Kyoto 615-8510, Japan

<sup>b</sup> Ichikawa Research Center, Sumitomo Metal Mining Co., Ltd., 3-18-5, Nakakokubun, Ichikawa, Chiba 272-8588, Japan

<sup>c</sup> Fukui Institute for Fundamental Chemistry, Kyoto University, Takano Nishibiraki-cho 34-4, Sakyo-ku, Kyoto 606-8103, Japan

## **\*Corresponding Authors**

Shoji IGUCHI: [iguchi.shoji.4k@kyoto-u.ac.jp](mailto:iguchi.shoji.4k@kyoto-u.ac.jp)

Kentaro TERAMURA: [teramura.kentaro.7r@kyoto-u.ac.jp](mailto:teramura.kentaro.7r@kyoto-u.ac.jp)

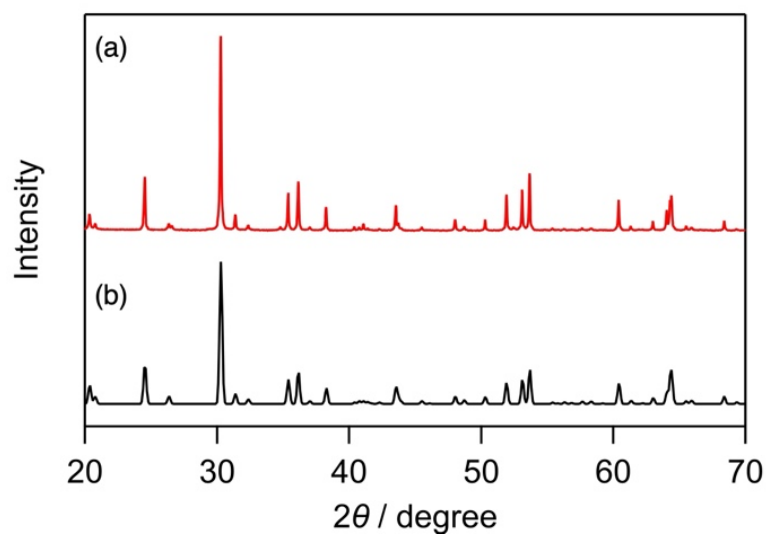

**Figure S1** XRD patterns of (a) ZnTa<sub>2</sub>O<sub>6</sub> and (b) reference patterns of ZnTa<sub>2</sub>O<sub>6</sub> (ICSD #36289).

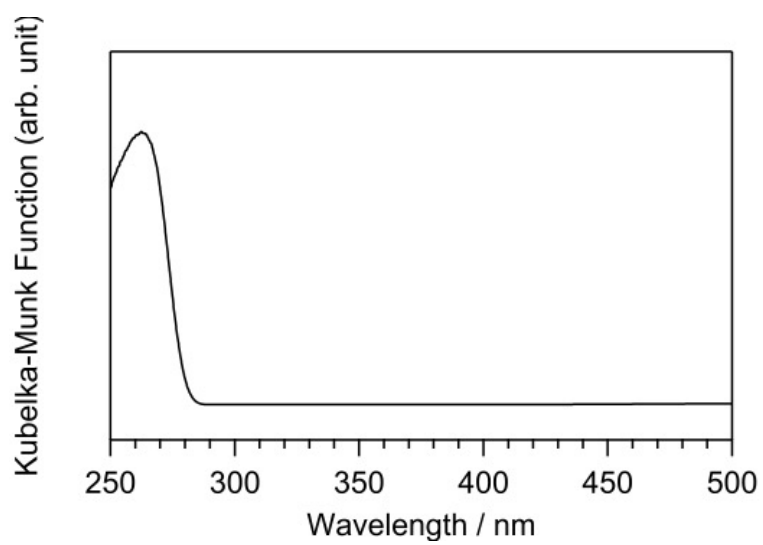

**Figure S2** Ultraviolet–visible (UV-vis) diffuse reflectance spectrum of  $\text{ZnTa}_2\text{O}_6$ .

---

**Table S1** The amount of loaded Ag co-catalyst on ZnTa<sub>2</sub>O<sub>6</sub> (Ag/ZnTa<sub>2</sub>O<sub>6</sub>) fabricated by the four different modification methods (i.e. USR, CR, IMP, and PD). The total amount of loaded Ag species was determined by analyzing solution after dissolving Ag/ZnTa<sub>2</sub>O<sub>6</sub> in concentrated nitric acid via inductively coupled plasma optical emission spectrometry (ICP–OES, iCAP 7400 ICP-OES DUO, Thermo Fischer Scientific Inc.).

| Modification method           | Calculated amount<br>(wt.%) | Experimental amount<br>(wt.%) |
|-------------------------------|-----------------------------|-------------------------------|
| Ultrasonic reduction<br>(USR) | 0.5                         | 0.49                          |
| Chemical reduction<br>(CR)    | 0.5                         | 0.47                          |
| Impregnation<br>(IMP)         | 0.5                         | 0.50                          |
| Photodeposition<br>(PD)       | 0.5                         | 0.46                          |

---

**Table S2** The amount of loaded Ag co-catalyst on ZnTa<sub>2</sub>O<sub>6</sub> (Ag/ZnTa<sub>2</sub>O<sub>6</sub>) fabricated by the USR method. The total amount of loaded Ag species was determined by analyzing solution after dissolving Ag/ZnTa<sub>2</sub>O<sub>6</sub> in concentrated nitric acid via inductively coupled plasma optical emission spectrometry (ICP–OES, iCAP 7400 ICP-OES DUO, Thermo Fischer Scientific Inc.).

| Calculated amount (wt.%) | Experimental amount (wt.%) |
|--------------------------|----------------------------|
| 0.1                      | 0.10                       |
| 0.5                      | 0.49                       |
| 1.0                      | 0.96                       |
| 2.0                      | 2.1                        |
| 3.0                      | 3.2                        |
| 5.0                      | 5.1                        |

---

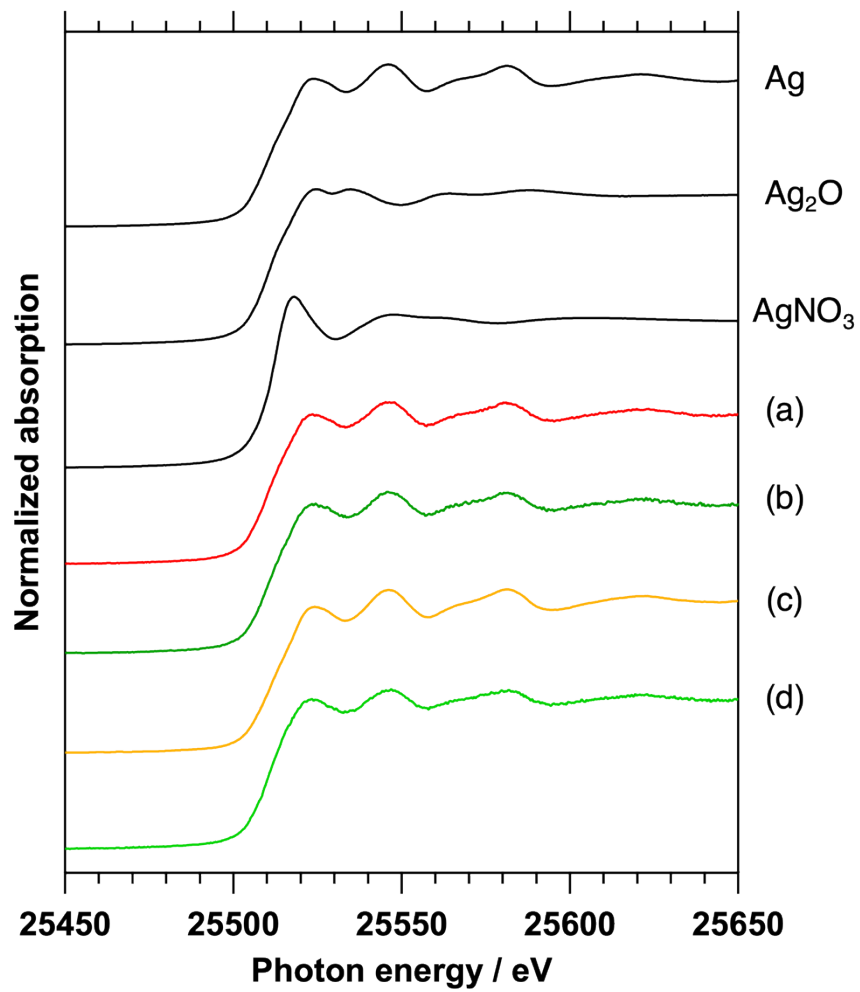

**Figure S3** XANES spectra of Ag loaded photocatalysts with references. (a) Ag/Ta<sub>2</sub>O<sub>5</sub>\_USR, (b) Ag/Ta<sub>2</sub>O<sub>5</sub>\_IMP, (c) Ag/Ga<sub>2</sub>O<sub>3</sub>\_USR, and (d) Ag/Ga<sub>2</sub>O<sub>3</sub>\_IMP.

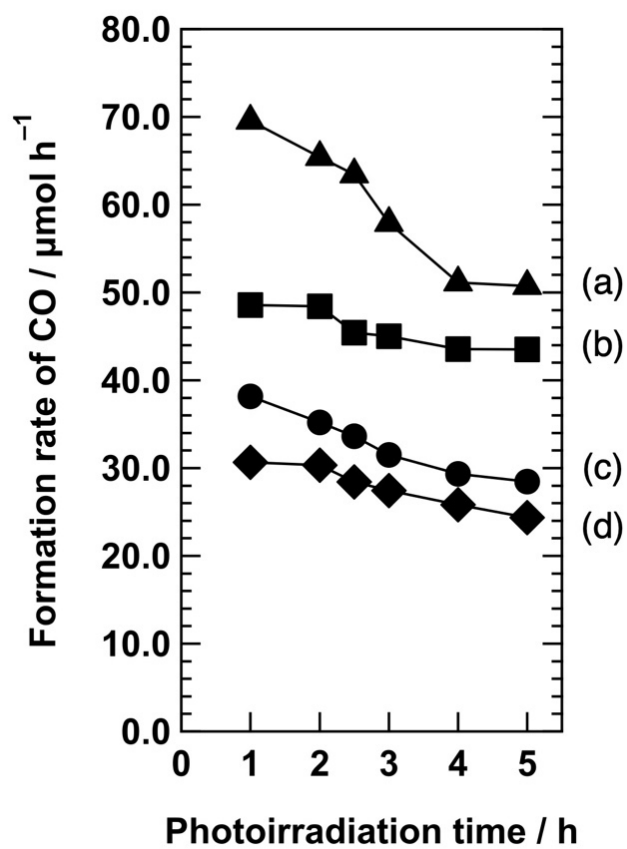

**Figure S4** Time courses of formation rates of CO over  $\text{Ag}/\text{ZnTa}_2\text{O}_6$  catalysts prepared by (a) an ultrasonic reduction (USR), (b) a chemical reduction (CR), (c) an impregnation (IMP), and (d) a photodeposition (PD) methods.

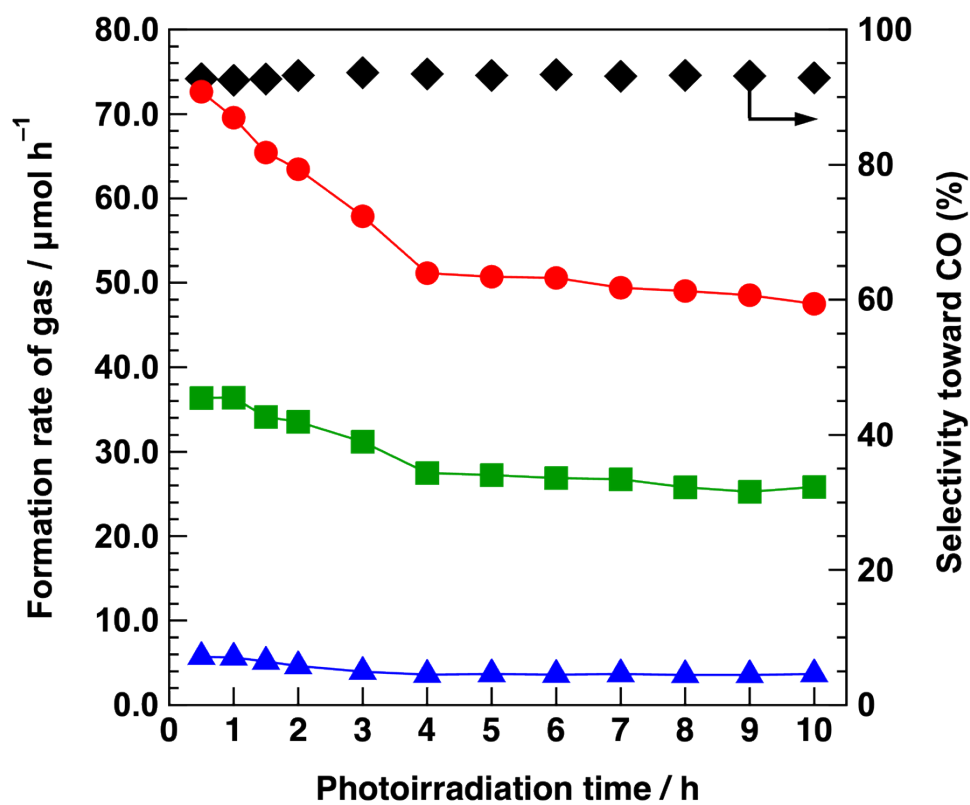

**Figure S5** Time courses of formation rates of  $\text{H}_2$  (blue),  $\text{O}_2$  (green), and CO (red), and selectivity toward CO evolution in the photocatalytic conversion of  $\text{CO}_2$  by  $\text{H}_2\text{O}$  over  $\text{Ag/ZnTa}_2\text{O}_6$  fabricated by the USR method.



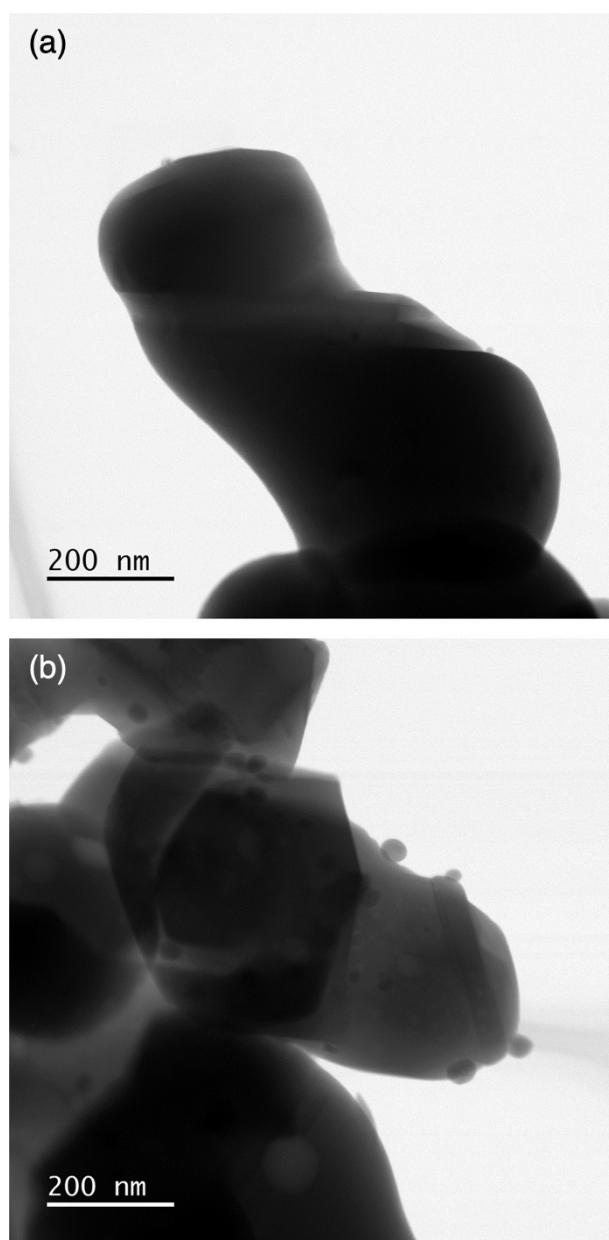

**Figure S6** TEM images of Ag/ZnTa<sub>2</sub>O<sub>6</sub> modified by the USR method; (a) before and (b) after photocatalytic reaction.

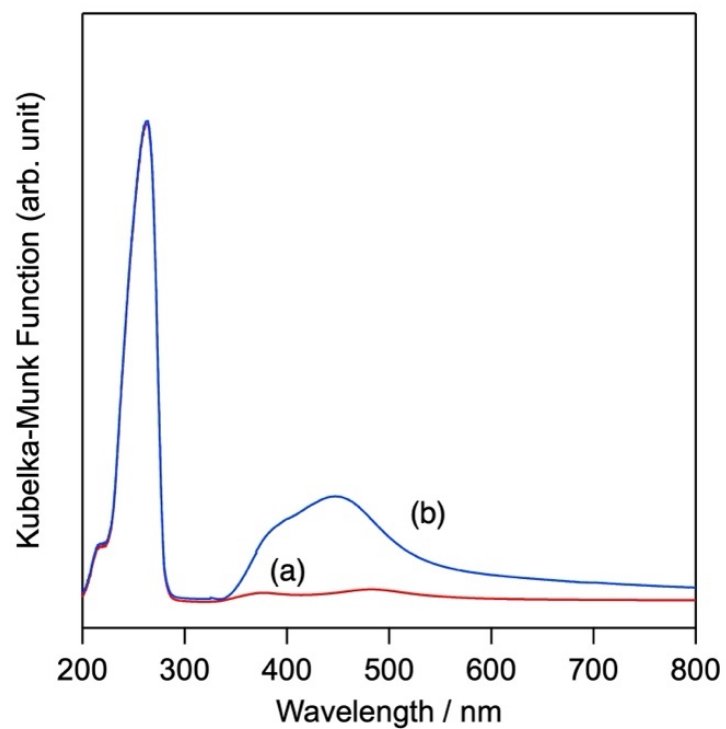

**Figure S7** UV-vis diffuse reflectance spectra of Ag/ZnTa<sub>2</sub>O<sub>6</sub> modified by the USR method (a) before and (b) after photocatalytic reaction.

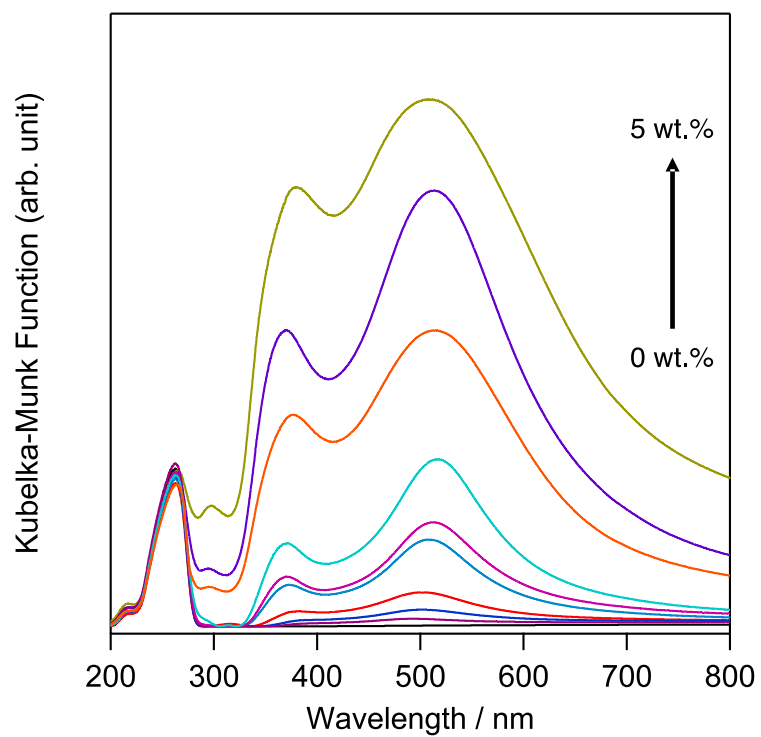

**Figure S8** UV-vis diffuse reflectance spectra of Ag/ZnTa<sub>2</sub>O<sub>6</sub> with various loading amounts of Ag fabricated by the USR method.

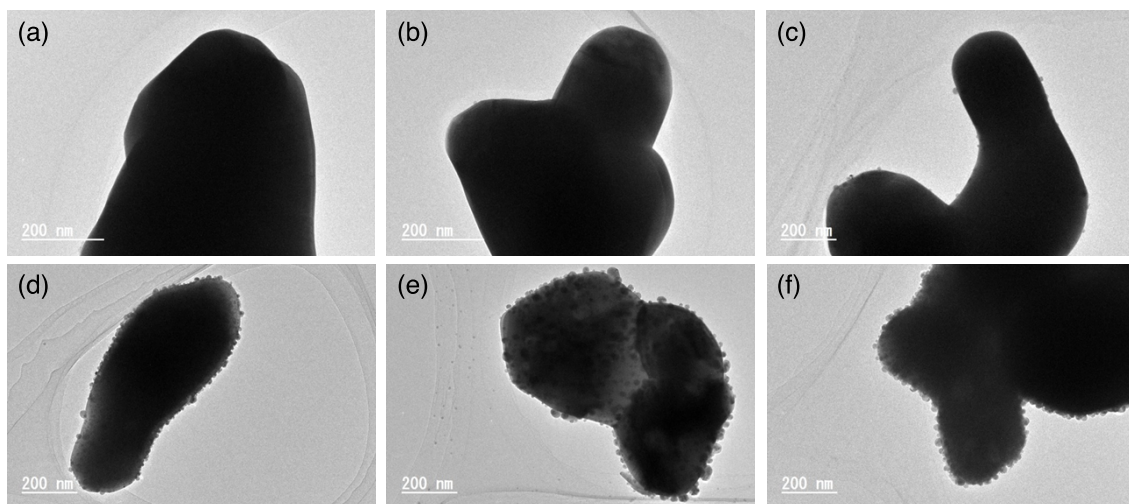

**Figure S9** TEM images of Ag/ZnTa<sub>2</sub>O<sub>6</sub> with various loading amounts of Ag fabricated by the USR method; (a) 0.1, (b) 0.5, (c) 1.0, (d) 2.0, (e) 3.0, and (f) 5.0 wt.%.

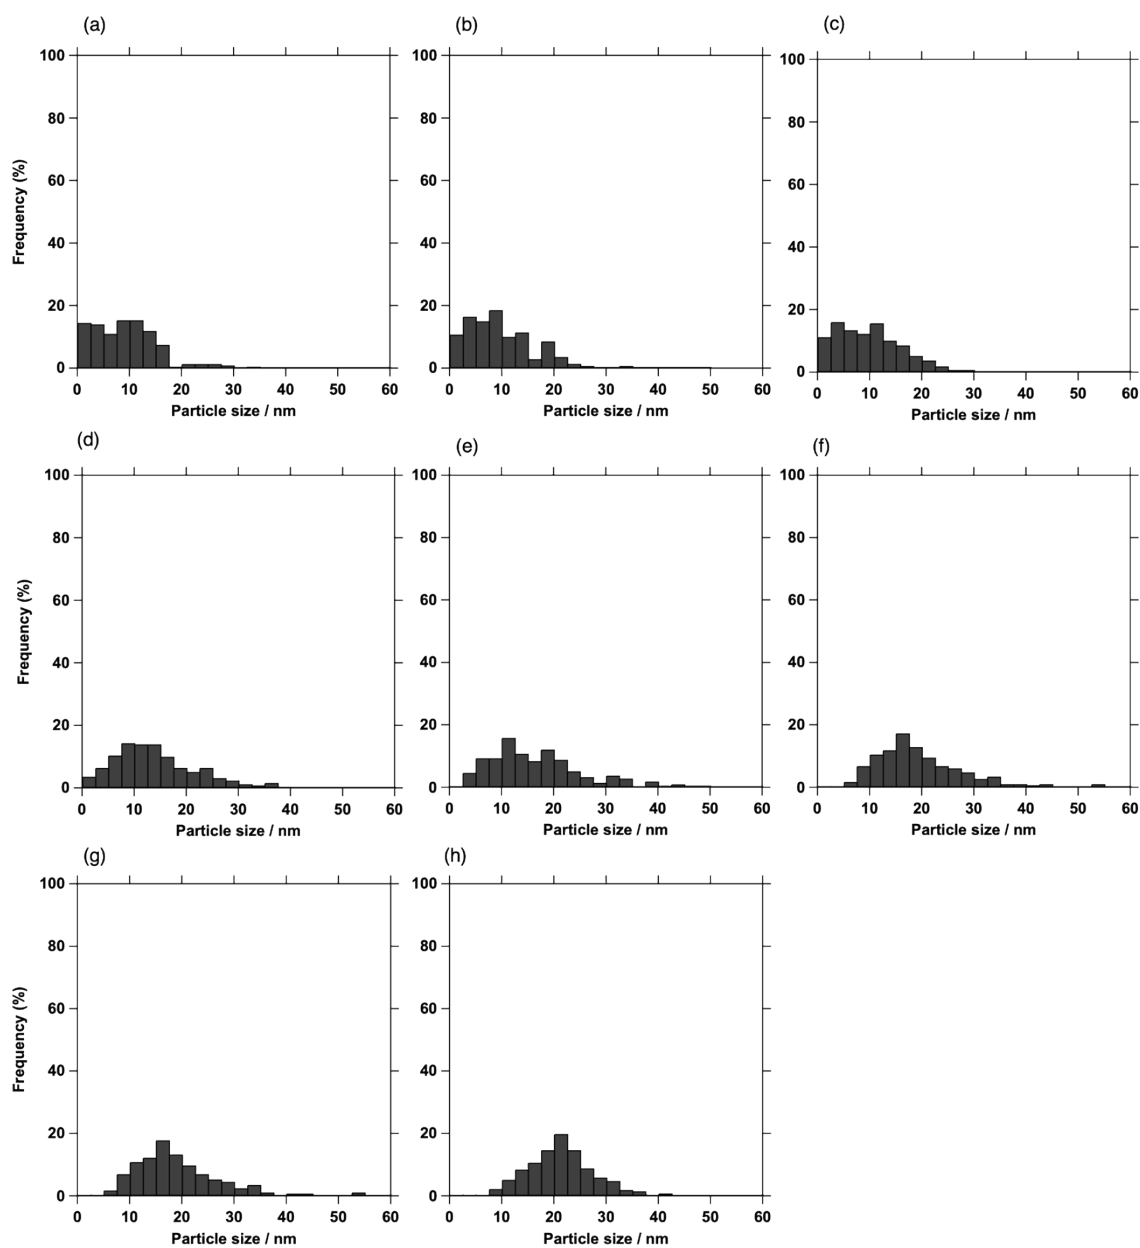

**Figure S10** The size distribution of Ag particles on the surface of ZnTa<sub>2</sub>O<sub>6</sub> with various loading amounts of Ag fabricated by the USR method; (a) 0.1, (b) 0.25, (c) 0.5, (d) 1.0, (e) 1.5, (f) 2.0, (g) 3.0, and (h) 5.0 wt.%.
